# Supplementary material
Source: publisher figshare collection journal article supplement (https://acs.figshare.com/ndownloader/files/5148688)
Supplement: Supplementary file 1 [file 5148688]

**Perturbation of Fluorescence by Non-Specific Interactions Between  
Anionic Poly(phenylenevinylene)s and Proteins: Implications for  
Biosensors**

Stephen J. Dwight, Brent S. Gaylord, Janice W. Hong,  
and Guillermo C. Bazan<sup>\*</sup>

*Departments of Chemistry and Materials, University of California, Santa  
Barbara, CA 93106*

*Institute for Polymers and Organic Solids*

*Received, XXXX, 2004*

---

<sup>\*</sup> Bazan@chem.ucsb.edu

## Supporting Information

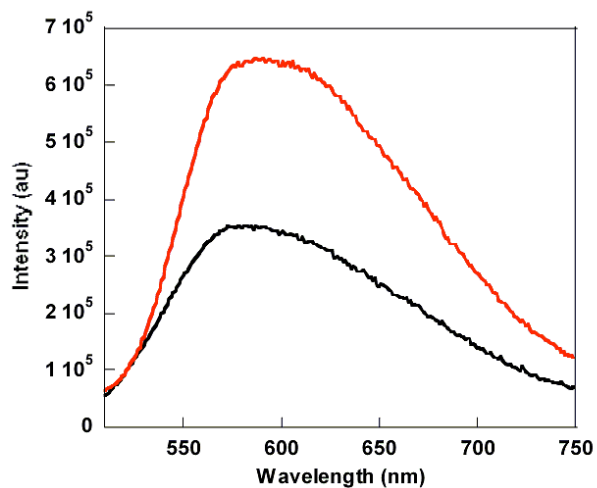

Figure S1: Fluorescence spectra ( $\lambda_{\text{ex}} = 500 \text{ nm}$ ) in water:  $\text{Na}^+$ -MPS-PPV ( $[\text{RU}] = 1.7 \times 10^{-5} \text{ M}$ ) (black line) and  $\text{Na}^+$ -MPS-PPV and  $[\text{avidin}] = 5 \times 10^{-7} \text{ M}$  (red line).

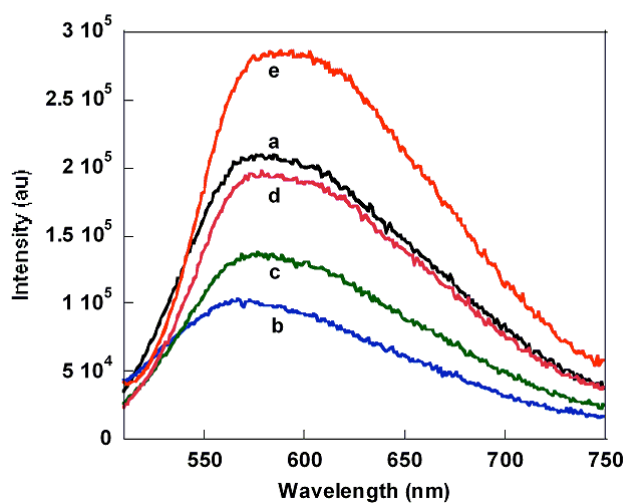

Figure S2: Fluorescence spectra ( $\lambda_{\text{ex}} = 500 \text{ nm}$ ) in water: (a)  $\text{Na}^+$ -MPS-PPV ( $[\text{RU}] = 1 \times 10^{-5} \text{ M}$ ) (black line); (b)  $\text{Na}^+$ -MPS-PPV and  $[\text{BPP}^+] = 3.2 \times 10^{-7} \text{ M}$  (blue line); (c)  $\text{Na}^+$ -MPS-PPV,  $\text{BPP}^+$ , and  $[\text{avidin}] = 3 \times 10^{-8} \text{ M}$  (green line); (d)  $\text{Na}^+$ -MPS-PPV,  $\text{BPP}^+$ , and  $[\text{avidin}] = 8 \times 10^{-8} \text{ M}$  (pink line); (e)  $\text{Na}^+$ -MPS-PPV,  $\text{BPP}^+$ , and  $[\text{avidin}] = 2.7 \times 10^{-7} \text{ M}$  (red line).

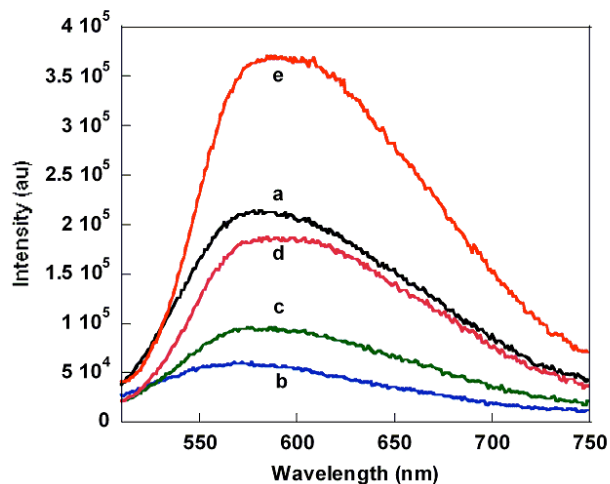

Figure S3: Fluorescence spectra ( $\lambda_{\text{ex}} = 500 \text{ nm}$ ) in water: (a)  $\text{Na}^+$ -MPS-PPV ( $[\text{RU}] = 1 \times 10^{-5} \text{ M}$ ) (black line); (b)  $\text{Na}^+$ -MPS-PPV and  $[\text{mMV}^+] = 3.2 \times 10^{-7} \text{ M}$  (blue line); (c)  $\text{Na}^+$ -MPS-PPV,  $\text{mMV}^+$ , and  $[\text{avidin}] = 2.4 \times 10^{-8} \text{ M}$  (green line); (d)  $\text{Na}^+$ -MPS-PPV,  $\text{mMV}^+$ , and  $[\text{avidin}] = 8 \times 10^{-8} \text{ M}$  (pink line); (e)  $\text{Na}^+$ -MPS-PPV,  $\text{mMV}^+$ , and  $[\text{avidin}] = 2.8 \times 10^{-7} \text{ M}$  (red line).

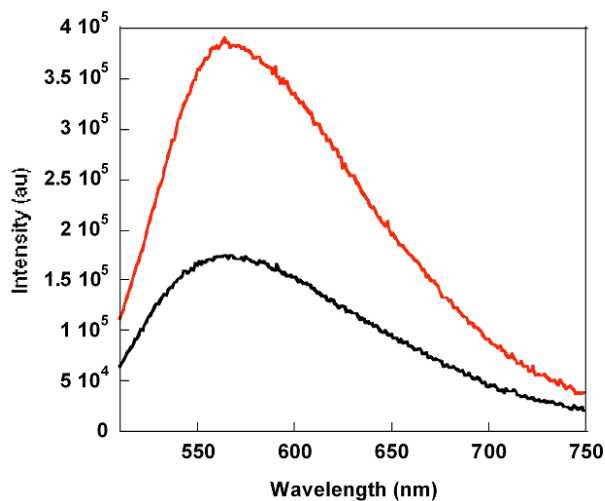

Figure S4: Fluorescence spectra ( $\lambda_{\text{ex}} = 500 \text{ nm}$ ) in water:  $\text{Li}^+$ -MPS-PPV ( $[\text{RU}] = 1.7 \times 10^{-5} \text{ M}$ ) (black line) and  $\text{Li}^+$ -MPS-PPV and  $[\text{Tau}] = 1 \times 10^{-7} \text{ M}$  (red line).

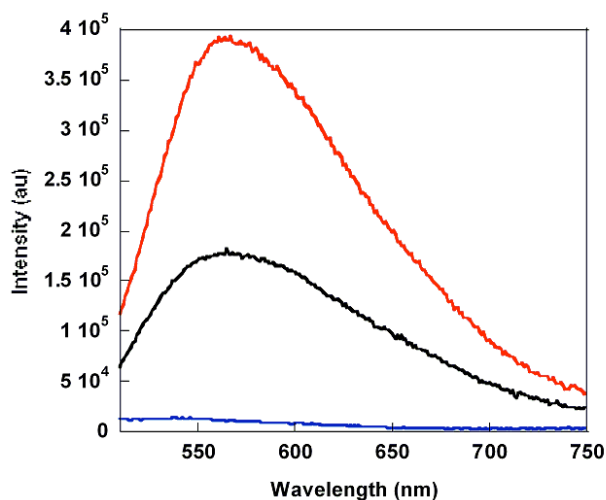

Figure S5: Fluorescence spectra ( $\lambda_{\text{ex}} = 500$  nm) in water: **Li<sup>+</sup>-MPS-PPV** ([RU] =  $1.7 \times 10^{-5}$  M) (black line); **Li<sup>+</sup>-MPS-PPV** and [**BPP<sup>+</sup>**] =  $2 \times 10^{-6}$  M (blue line); **Li<sup>+</sup>-MPS-PPV**, **BPP<sup>+</sup>**, and [Tau] =  $1 \times 10^{-7}$  M (red line).

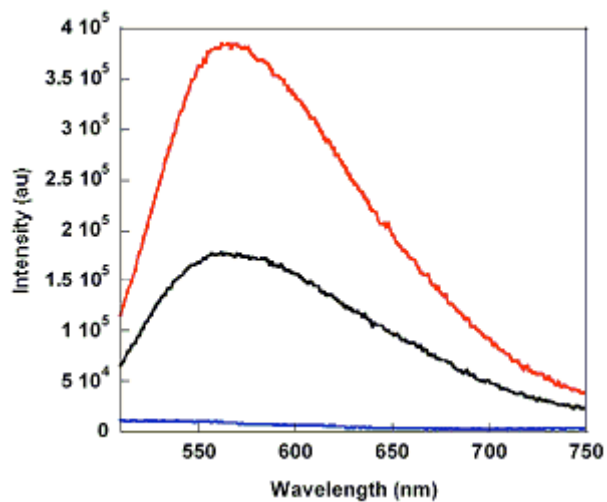

Figure S6: Fluorescence spectra ( $\lambda_{\text{ex}} = 500$  nm) in water: **Li<sup>+</sup>-MPS-PPV** ([RU] =  $1.7 \times 10^{-5}$  M) (black line); **Li<sup>+</sup>-MPS-PPV** and [**mMV<sup>+</sup>**] =  $2 \times 10^{-6}$  M (blue line); **Li<sup>+</sup>-MPS-PPV**, **mMV<sup>+</sup>**, and [Tau] =  $1 \times 10^{-7}$  M (red line).

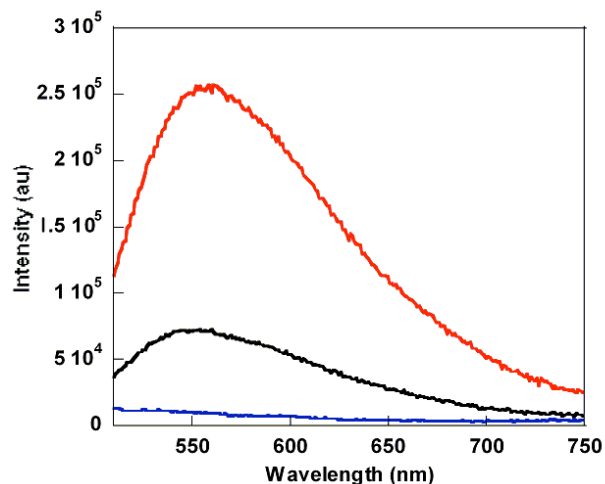

Figure S7: Fluorescence spectra ( $\lambda_{\text{ex}} = 500 \text{ nm}$ ) in water: **Li<sup>+</sup>-MPS-PPV** ( $[\text{RU}] = 1.7 \times 10^{-5} \text{ M}$ ) (black line); **Li<sup>+</sup>-MPS-PPV** and  $[\text{mMV}^+] = 2 \times 10^{-6} \text{ M}$  (blue line); **Li<sup>+</sup>-MPS-PPV**, **mMV<sup>+</sup>**, and  $[\text{pepsin-A}] = 3 \times 10^{-7} \text{ M}$  (red line).

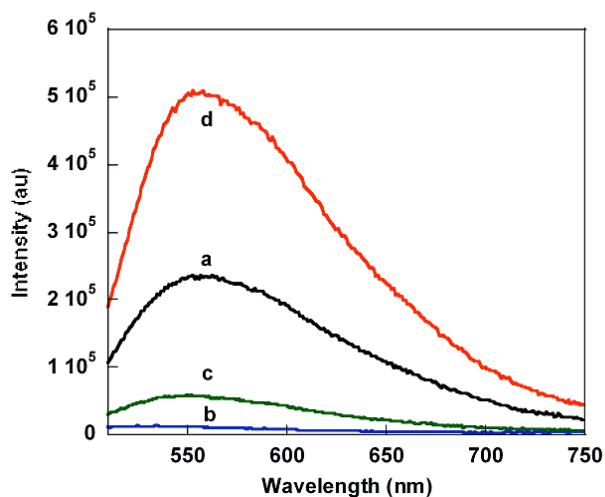

Figure S8: Fluorescence spectra ( $\lambda_{\text{ex}} = 500 \text{ nm}$ ) in water: (a) **Li<sup>+</sup>-MPS-PPV** ( $[\text{RU}] = 1.7 \times 10^{-5} \text{ M}$ ) (black line); (b) **Li<sup>+</sup>-MPS-PPV** and  $[\text{BPP}^+] = 2 \times 10^{-6} \text{ M}$ , (blue line); (c) **Li<sup>+</sup>-MPS-PPV**, **BPP<sup>+</sup>**, and  $[\text{pepsin-A}] = 3 \times 10^{-7} \text{ M}$  (green line); (d) **Li<sup>+</sup>-MPS-PPV** and  $[\text{pepsin-A}] = 3 \times 10^{-7} \text{ M}$  (red line).

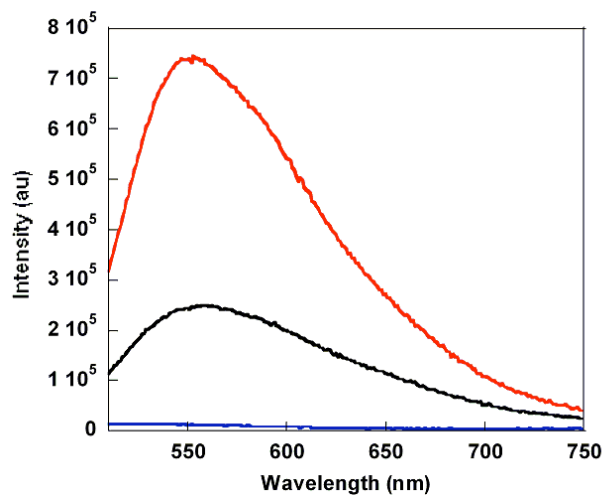

Figure S9: Fluorescence spectra ( $\lambda_{\text{ex}} = 500$  nm) in water: **Li<sup>+</sup>-MPS-PPV** ( $[\text{RU}] = 1.7 \times 10^{-5}$  M) (black line); **Li<sup>+</sup>-MPS-PPV** and  $[\text{mMV}^+] = 2 \times 10^{-6}$  M (blue line); **Li<sup>+</sup>-MPS-PPV**, **mMV<sup>+</sup>**, and  $[\text{BSA}] = 3 \times 10^{-7}$  M (red line).

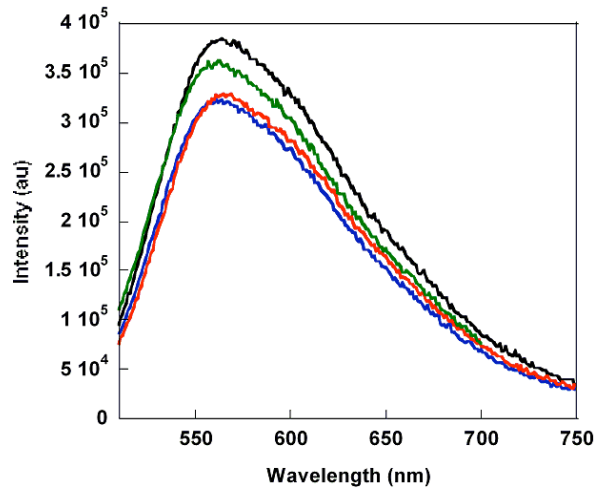

Figure S10: Fluorescence spectra ( $\lambda_{\text{ex}} = 500$  nm) in 0.1M  $(\text{NH}_4)_2\text{CO}_3$ : **Li<sup>+</sup>-MPS-PPV** ( $[\text{RU}] = 1.7 \times 10^{-5}$  M) (black line); **Li<sup>+</sup>-MPS-PPV** and  $[\text{BPP}^+] = 2 \times 10^{-6}$  M (blue line); **Li<sup>+</sup>-MPS-PPV**, **BPP<sup>+</sup>**, and  $[\text{pepsin-A}] = 3 \times 10^{-7}$  M (red line); **Li<sup>+</sup>-MPS-PPV** and  $[\text{pepsin-A}] = 3 \times 10^{-7}$  M (green line).

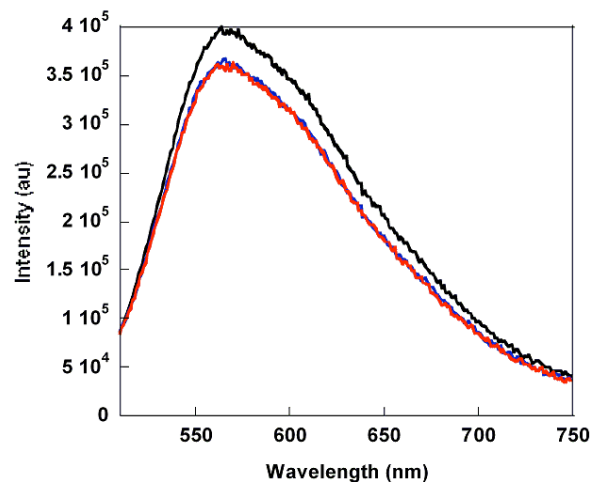

Figure S11: Fluorescence spectra ( $\lambda_{\text{ex}} = 500 \text{ nm}$ ) in  $0.1\text{M } (\text{NH}_4)_2\text{CO}_3$ : **Li<sup>+</sup>-MPS-PPV** ( $[\text{RU}] = 1.7 \times 10^{-5} \text{ M}$ ) (black line); **Li<sup>+</sup>-MPS-PPV** and  $[\text{mMV}^+] = 2 \times 10^{-6} \text{ M}$  (blue line); **Li<sup>+</sup>-MPS-PPV**, **mMV<sup>+</sup>**, and  $[\text{pepsin-A}] = 3 \times 10^{-7} \text{ M}$  (red line).

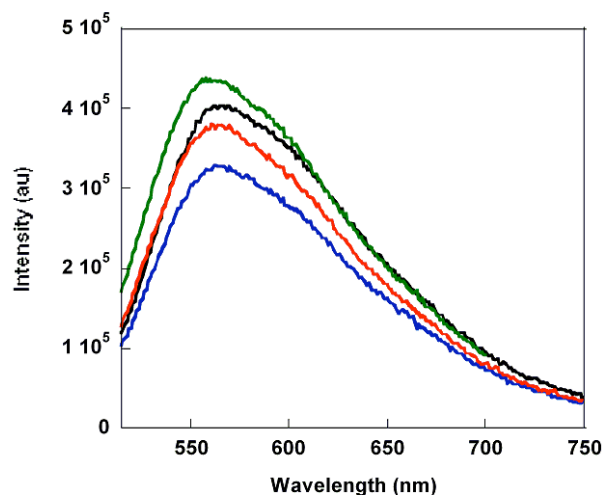

Figure S12: Fluorescence spectra ( $\lambda_{\text{ex}} = 500 \text{ nm}$ ) in  $0.1\text{M } (\text{NH}_4)_2\text{CO}_3$ : **Li<sup>+</sup>-MPS-PPV** ( $[\text{RU}] = 1.7 \times 10^{-5} \text{ M}$ ) (black line); **Li<sup>+</sup>-MPS-PPV** and  $[\text{BPP}^+] = 2 \times 10^{-6} \text{ M}$  (blue line); **Li<sup>+</sup>-MPS-PPV**, **BPP<sup>+</sup>**, and  $[\text{BSA}] = 3 \times 10^{-7} \text{ M}$  (red line); **Li<sup>+</sup>-MPS-PPV** and  $[\text{BSA}] = 3 \times 10^{-7} \text{ M}$  (green line).

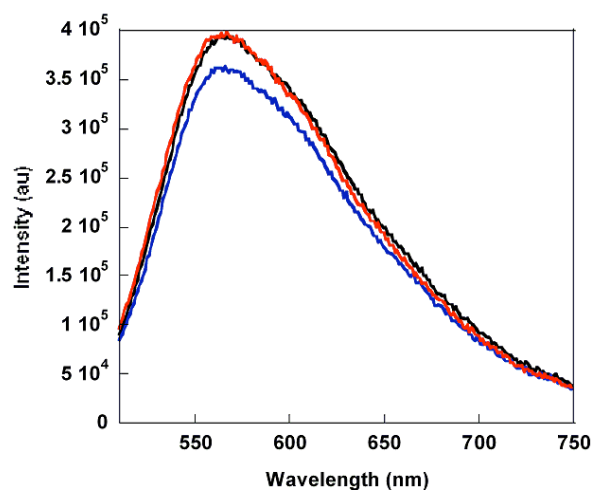

Figure S13: Fluorescence spectra ( $\lambda_{\text{ex}} = 500 \text{ nm}$ ) in  $0.1 \text{ M } (\text{NH}_4)_2\text{CO}_3$ : **Li<sup>+</sup>-MPS-PPV** ( $[\text{RU}] = 1.7 \times 10^{-5} \text{ M}$ ) (black line); **Li<sup>+</sup>-MPS-PPV** and  $[\text{mMV}^+] = 2 \times 10^{-6} \text{ M}$  (blue line); **Li<sup>+</sup>-MPS-PPV**, **mMV<sup>+</sup>**, and  $[\text{BSA}] = 3 \times 10^{-7} \text{ M}$  (red line).

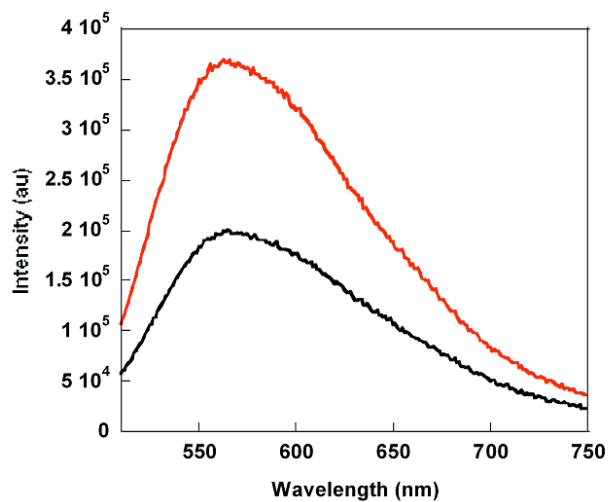

Figure S14: Fluorescence spectra ( $\lambda_{\text{ex}} = 500 \text{ nm}$ ) in  $0.1 \text{ M } (\text{NH}_4)_2\text{CO}_3$  at pH 8.9: of **Li<sup>+</sup>-MPS-PPV** ( $[\text{RU}] = 1.7 \times 10^{-5} \text{ M}$ ) (black line); **Li<sup>+</sup>-MPS-PPV** and  $[\text{Tau}] = 1 \times 10^{-7} \text{ M}$  (red line).



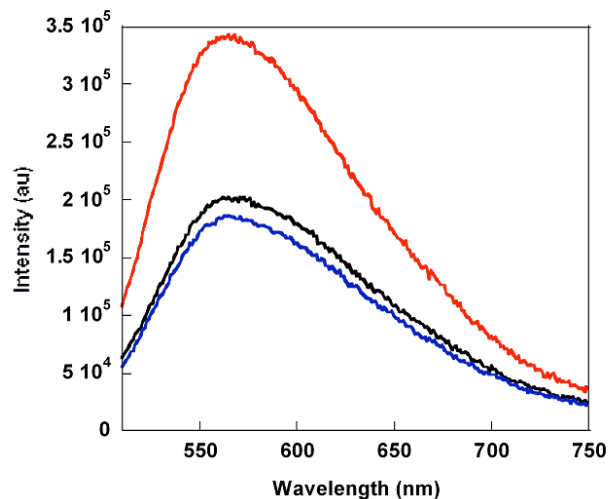

Figure S15: Fluorescence spectra ( $\lambda_{\text{ex}} = 500$  nm) in 0.1 M  $(\text{NH}_4)_2\text{CO}_3$  at pH 8.9: **Li<sup>+</sup>-MPS-PPV** ( $[\text{RU}] = 1.7 \times 10^{-5}$  M) (black line); **Li<sup>+</sup>-MPS-PPV** and  $[\text{mMV}^+] = 2 \times 10^{-6}$  M (blue line); **Li<sup>+</sup>-MPS-PPV**, **mMV<sup>+</sup>**, and  $[\text{Tau}] = 1 \times 10^{-7}$  (red line).

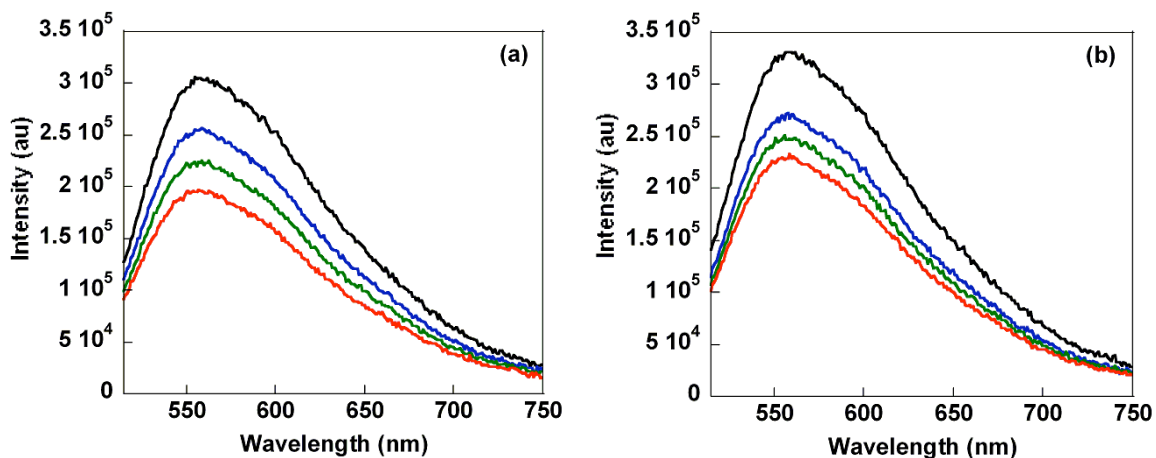

Figure S16: Fluorescence spectra ( $\lambda_{\text{ex}} = 500$  nm) in 0.1 M  $(\text{NH}_4)_2\text{CO}_3$  at pH 8.9: **Li<sup>+</sup>-MPS-PPV** ( $[\text{RU}] = 1.7 \times 10^{-5}$  M) (black line); **Li<sup>+</sup>-MPS-PPV** and  $[\text{BPP}^+] = 2 \times 10^{-6}$  M (blue line); **Li<sup>+</sup>-MPS-PPV**, **BPP<sup>+</sup>**, and  $[\text{avidin}] = 1 \times 10^{-7}$  M avidin (green line); **Li<sup>+</sup>-MPS-PPV**, **BPP<sup>+</sup>**, and  $[\text{avidin}] = 2 \times 10^{-7}$  M avidin (red line). Figure S16a: Avidin has four vacant biotin binding sites per protein. Figure S16b: Avidin has three vacant biotin binding sites per protein.

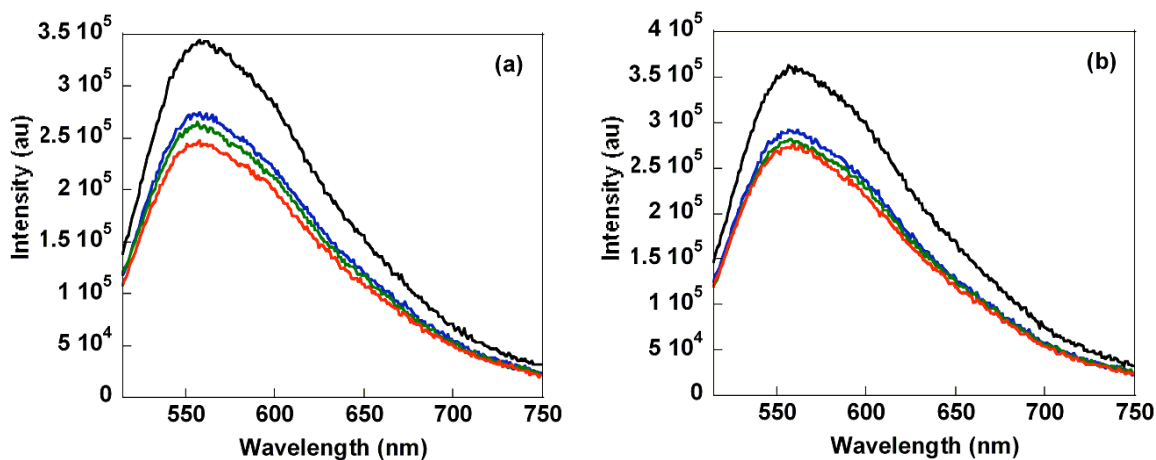

Figure S17: Fluorescence spectra ( $\lambda_{\text{ex}} = 500 \text{ nm}$ ) in  $0.1 \text{ M } (\text{NH}_4)_2\text{CO}_3$  at pH 8.9: **Li<sup>+</sup>-MPS-PPV** ( $[\text{RU}] = 1.7 \times 10^{-5} \text{ M}$ ) (black line); **Li<sup>+</sup>-MPS-PPV** and **[BPP<sup>+</sup>] =  $2 \times 10^{-6} \text{ M}$**  (blue line); **Li<sup>+</sup>-MPS-PPV**, **BPP<sup>+</sup>**, and **[avidin] =  $1 \times 10^{-7} \text{ M}$**  avidin (green line); **Li<sup>+</sup>-MPS-PPV**, **BPP<sup>+</sup>**, and **[avidin] =  $2 \times 10^{-7} \text{ M}$**  avidin (red line). Figure S17a: Avidin has two vacant biotin binding sites per protein. Figure S17b: Avidin has one vacant biotin binding site per protein.

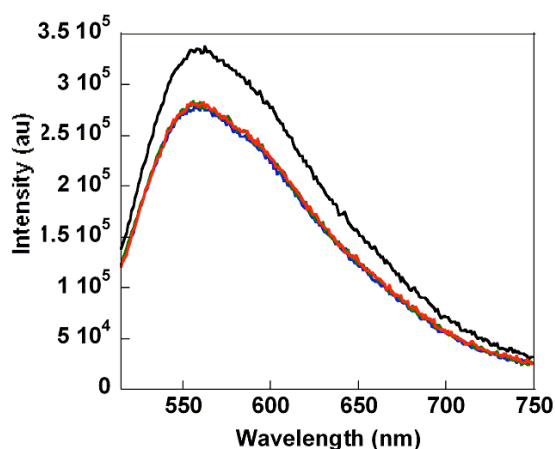

Figure S18: Fluorescence spectra ( $\lambda_{\text{ex}} = 500 \text{ nm}$ ) in  $0.1 \text{ M } (\text{NH}_4)_2\text{CO}_3$  at pH 8.9: (a) **Li<sup>+</sup>-MPS-PPV** ( $[\text{RU}] = 1.7 \times 10^{-5} \text{ M}$ ) (black line); (b) **Li<sup>+</sup>-MPS-PPV** and **[BPP<sup>+</sup>] =  $2 \times 10^{-6} \text{ M}$**  (blue line); (c) **Li<sup>+</sup>-MPS-PPV**, **BPP<sup>+</sup>**, and **[avidin] =  $1 \times 10^{-7} \text{ M}$**  avidin (green line); (d) **Li<sup>+</sup>-MPS-PPV**, **BPP<sup>+</sup>**, and **[avidin] =  $2 \times 10^{-7} \text{ M}$**  avidin (red line). Avidin used has no vacant biotin binding sites.

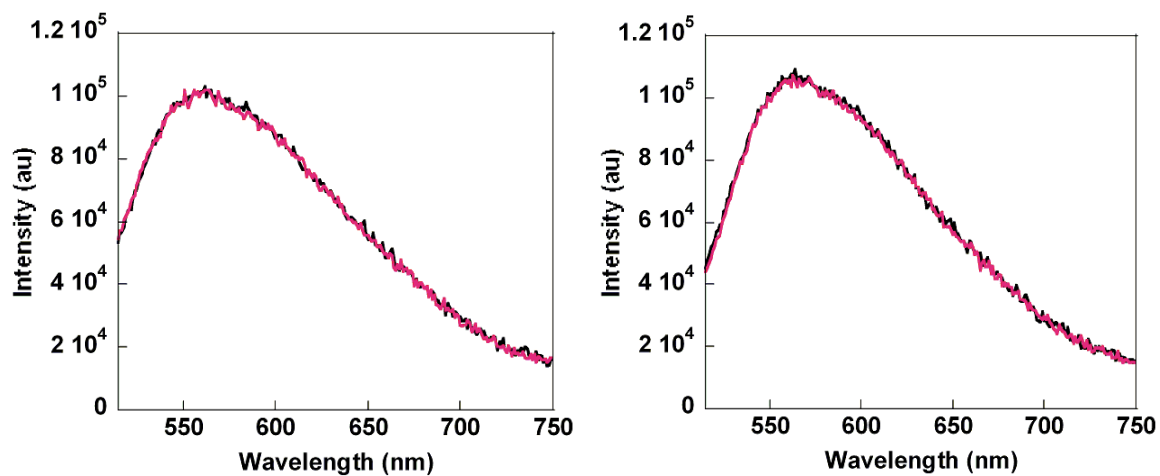

Figure S19: Fluorescence spectra ( $\lambda_{\text{ex}} = 500 \text{ nm}$ ) in water (left chart) and 0.1 M  $(\text{NH}_4)_2\text{CO}_3$  at pH 8.9 (right chart): **Li<sup>+</sup>-MPS-PPV** ( $[\text{RU}] = 1.7 \times 10^{-5} \text{ M}$ ) (black line); **Li<sup>+</sup>-MPS-PPV** ( $[\text{RU}] = 1.7 \times 10^{-5} \text{ M}$ ) (red line) after 15 consecutive scans. Samples were mixed for 4-5 seconds between each scan. Similar results were obtained for **Na<sup>+</sup>-MPS-PPV** in water and  $(\text{NH}_4)_2\text{CO}_3$  buffer.
